# Supplementary material
Source: PubMed Central journal article supplement (PMC3548946)

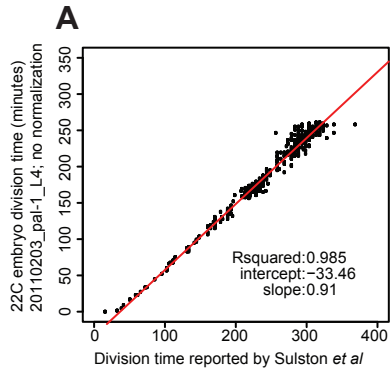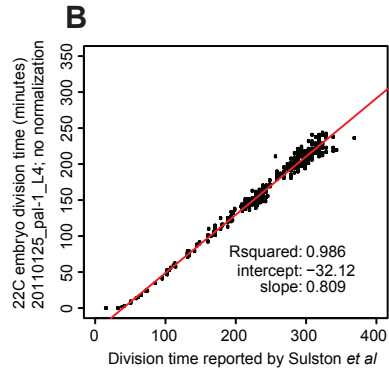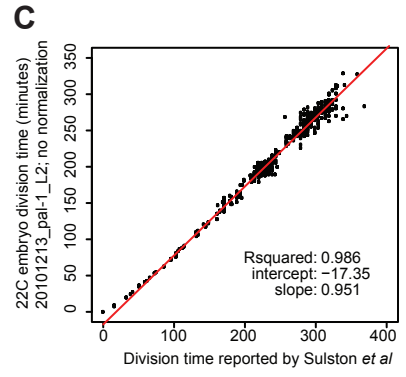

Supplement: NIHMS428096-supplement-01.pdf [file NIHMS428096-supplement-01.pdf]

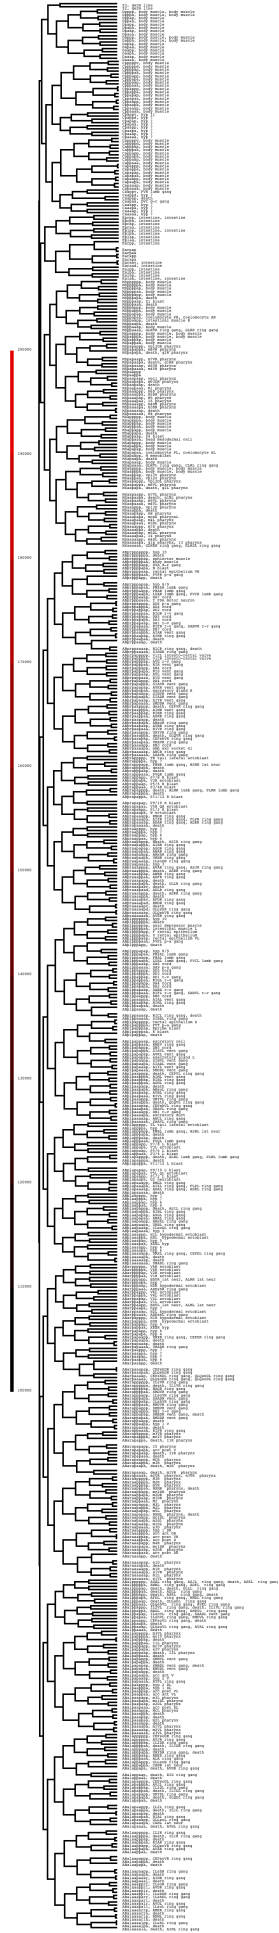

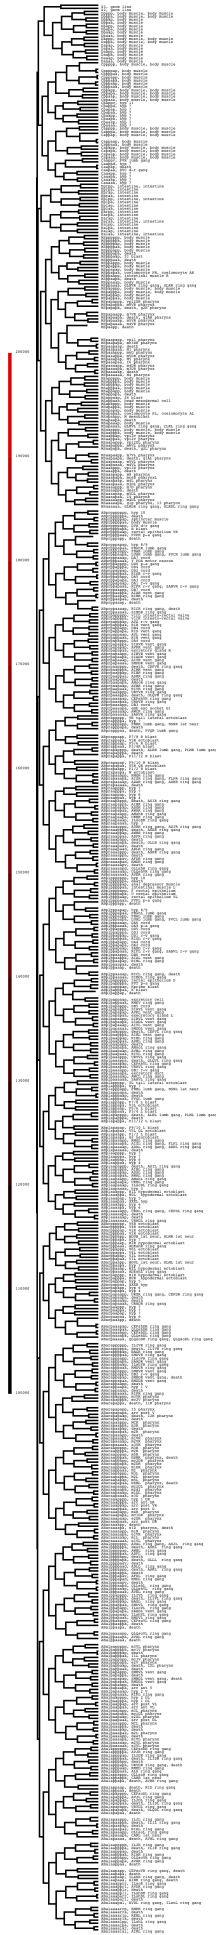

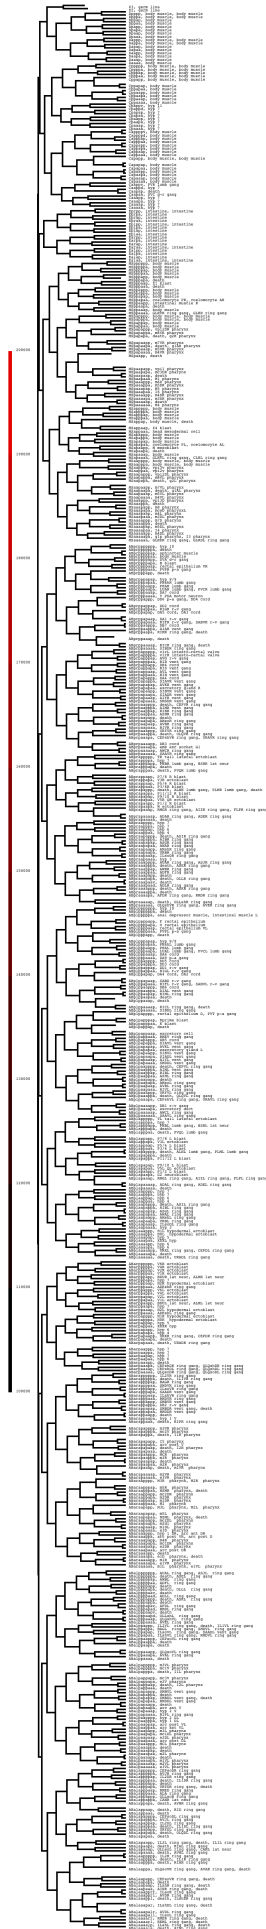

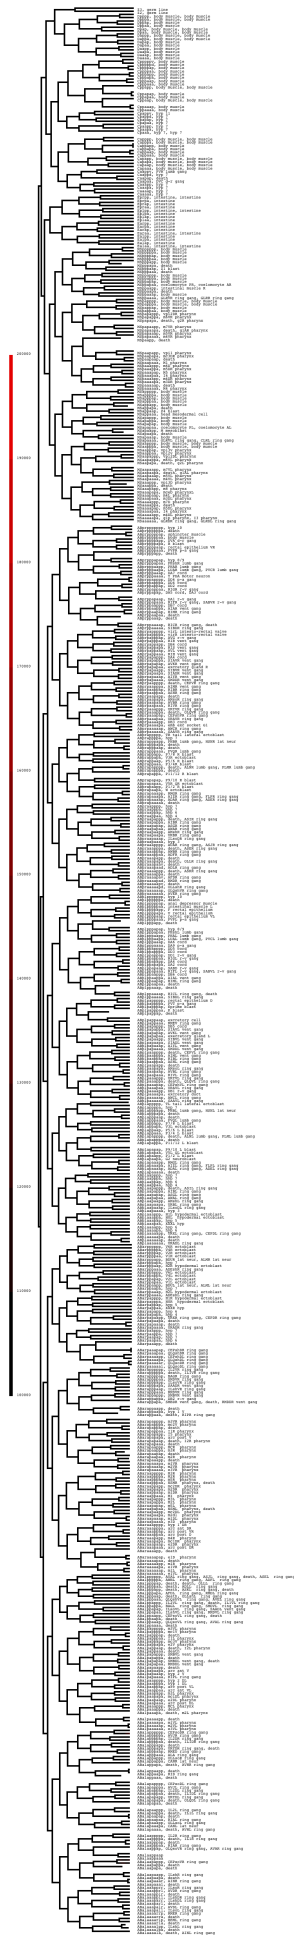



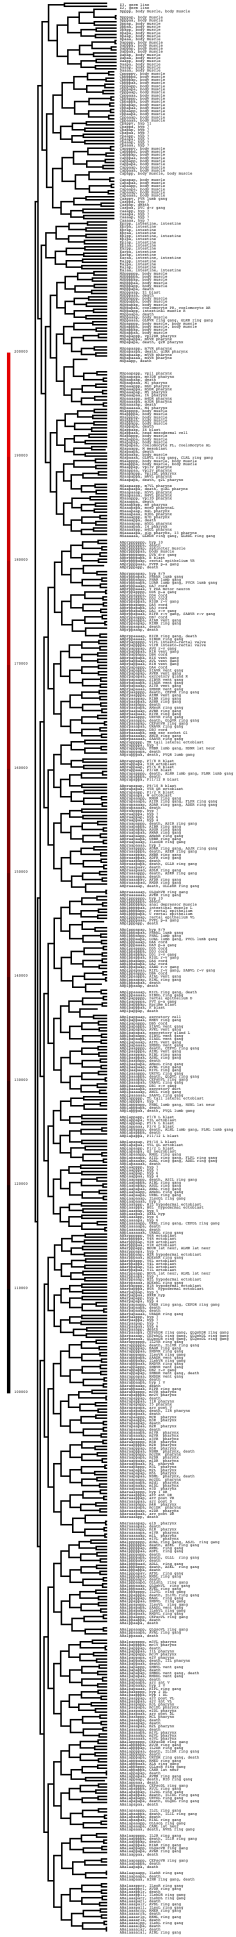

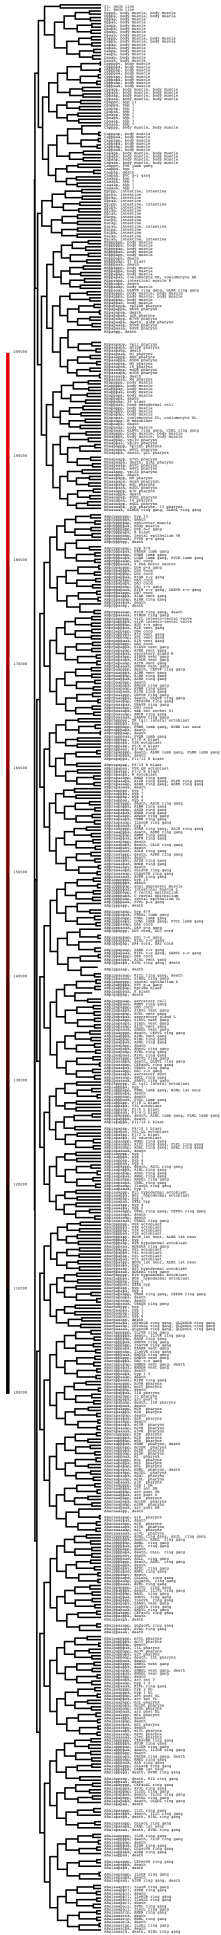

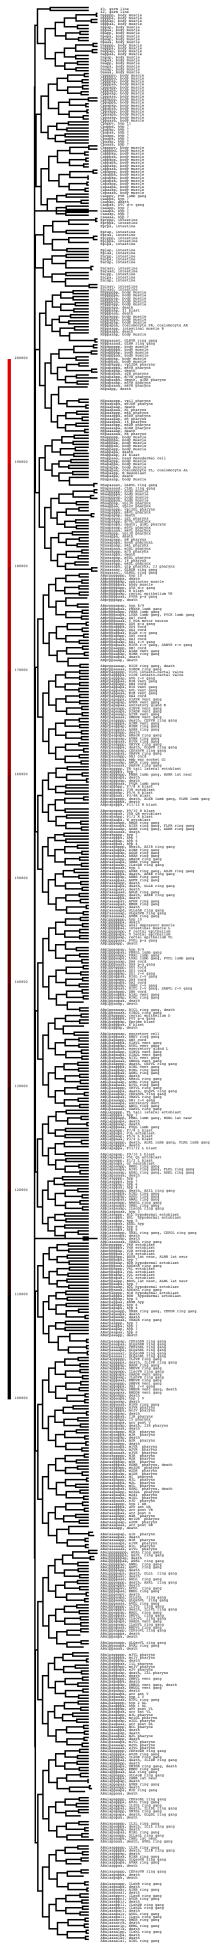

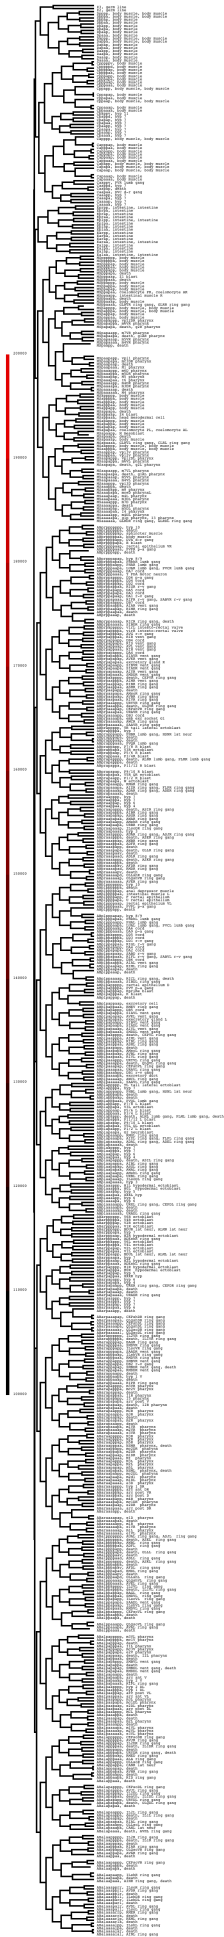

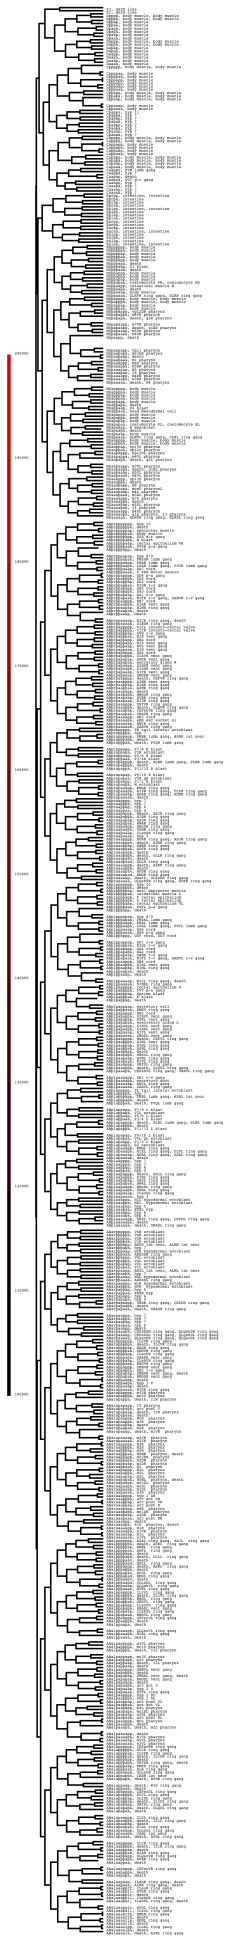

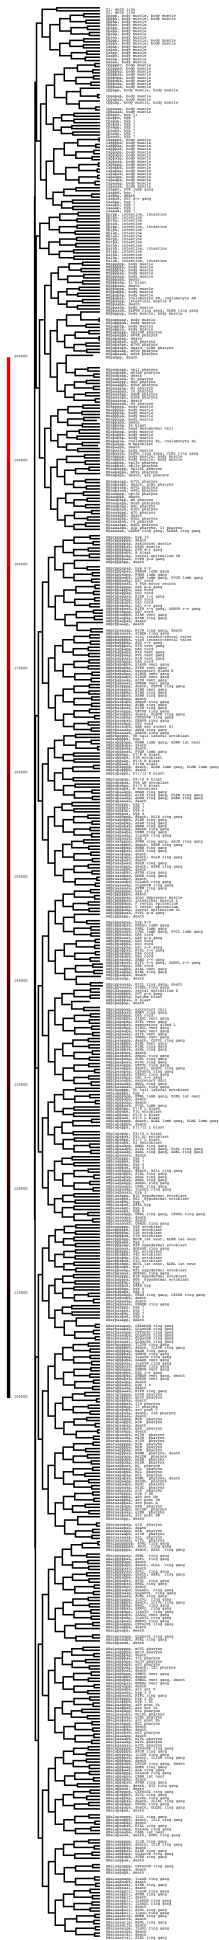

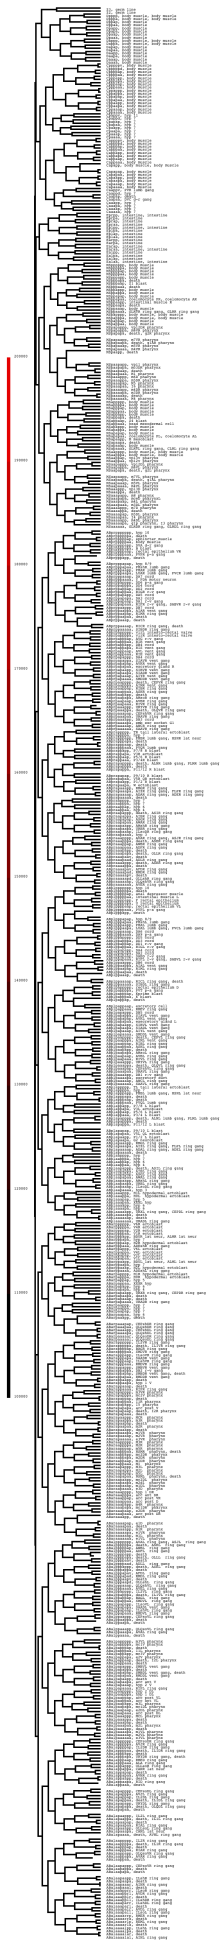

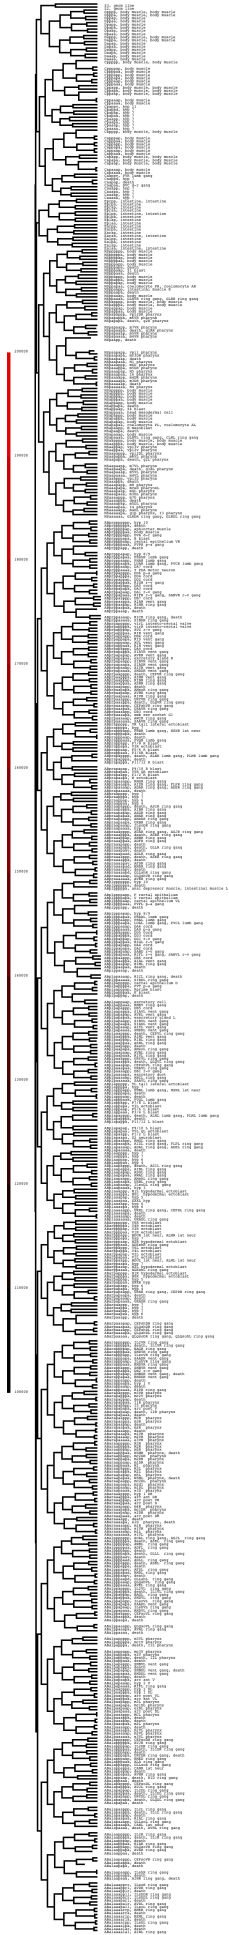



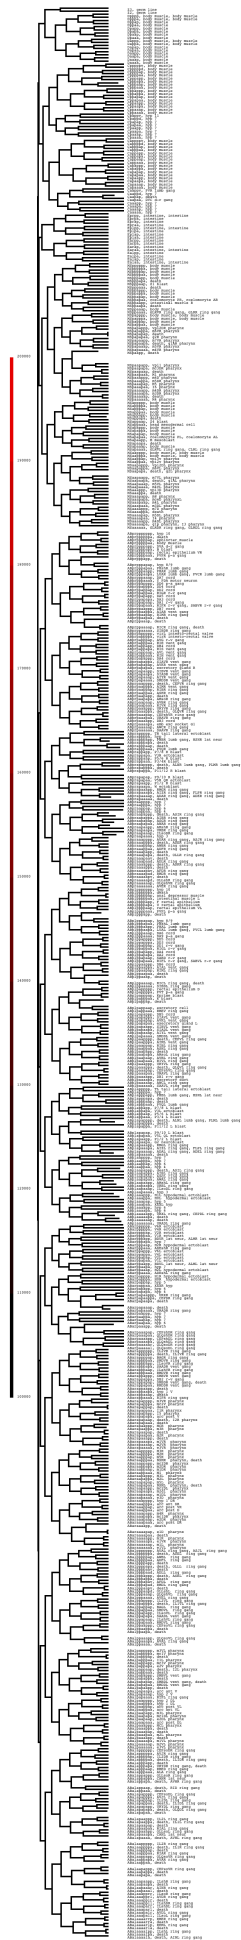

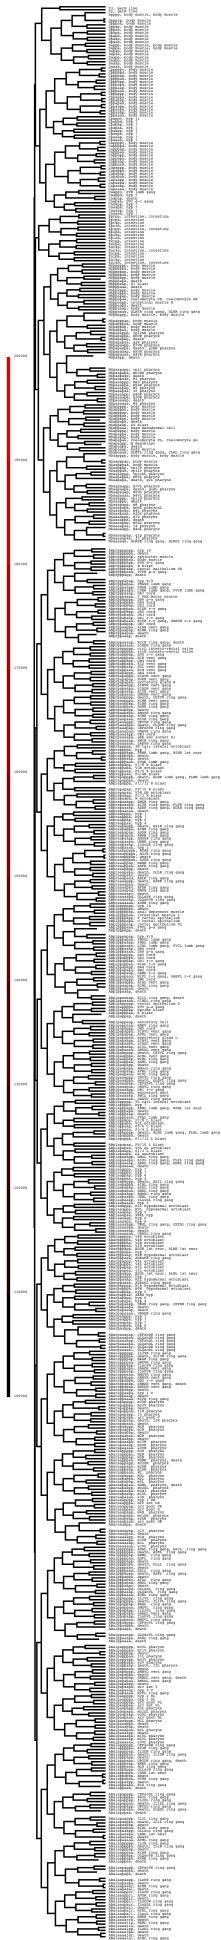

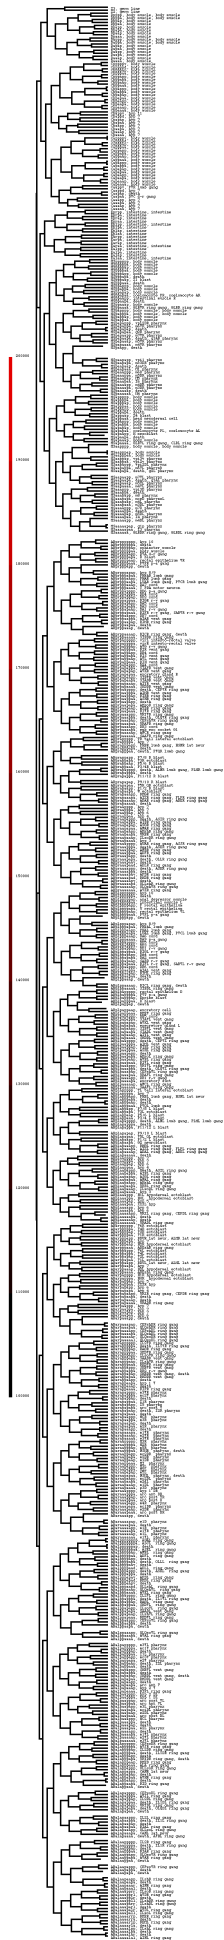

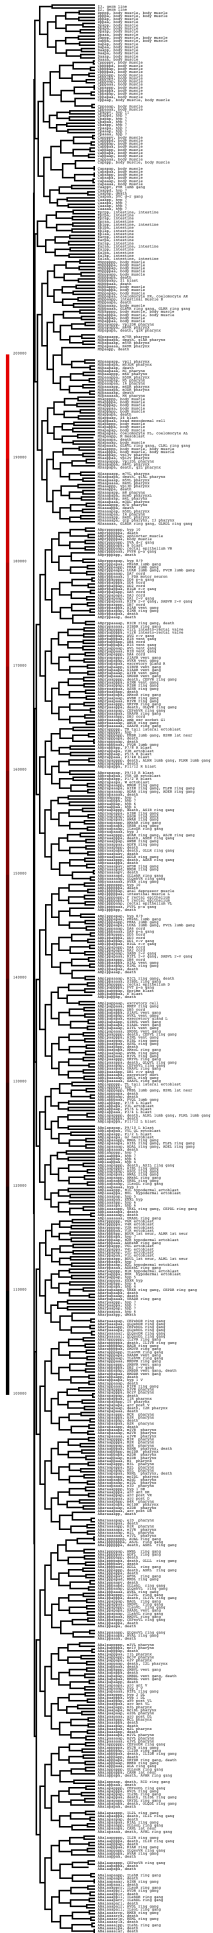

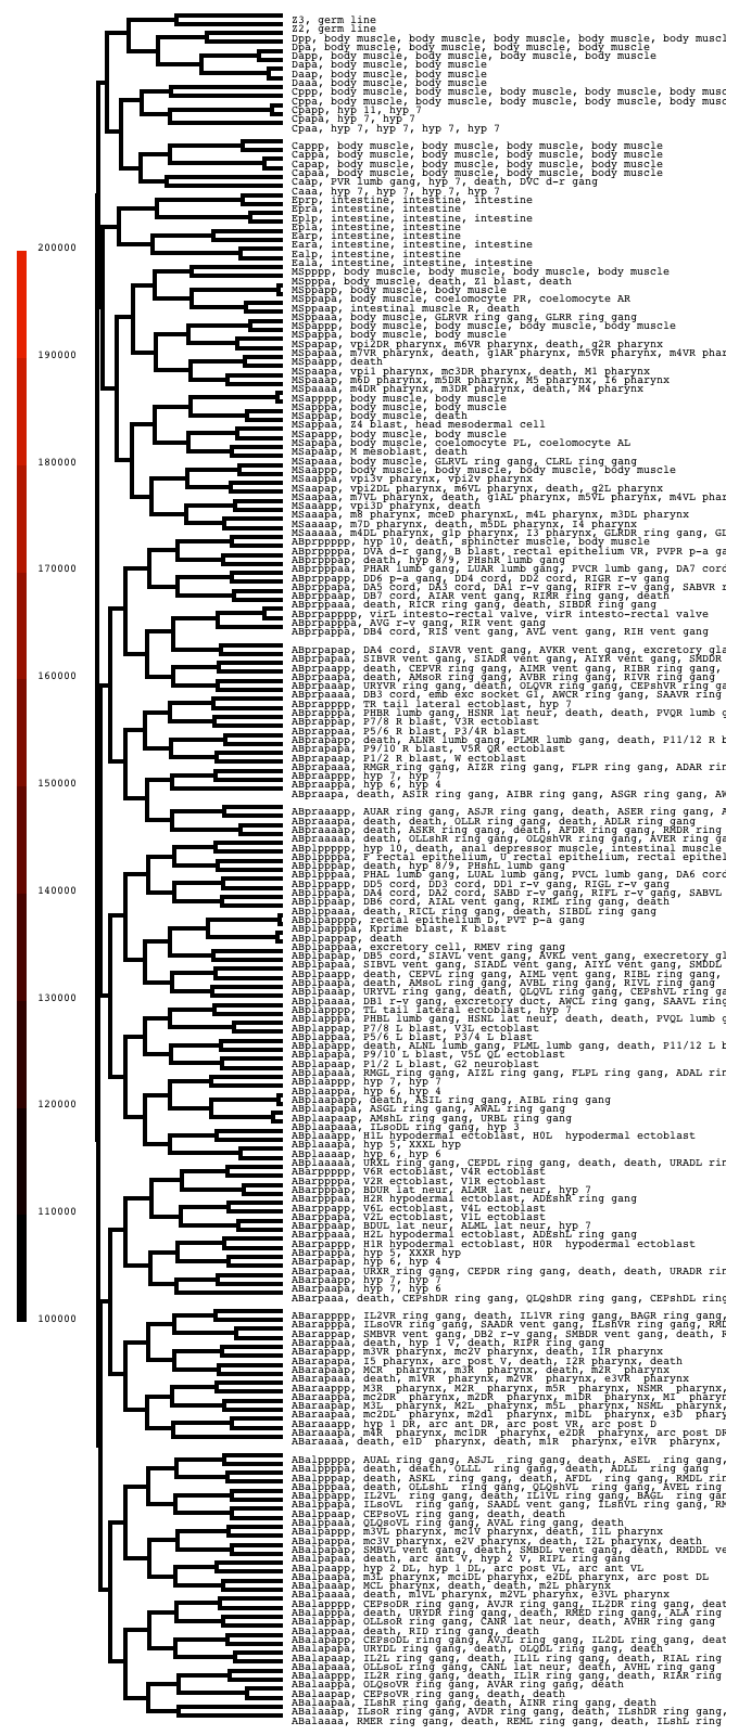

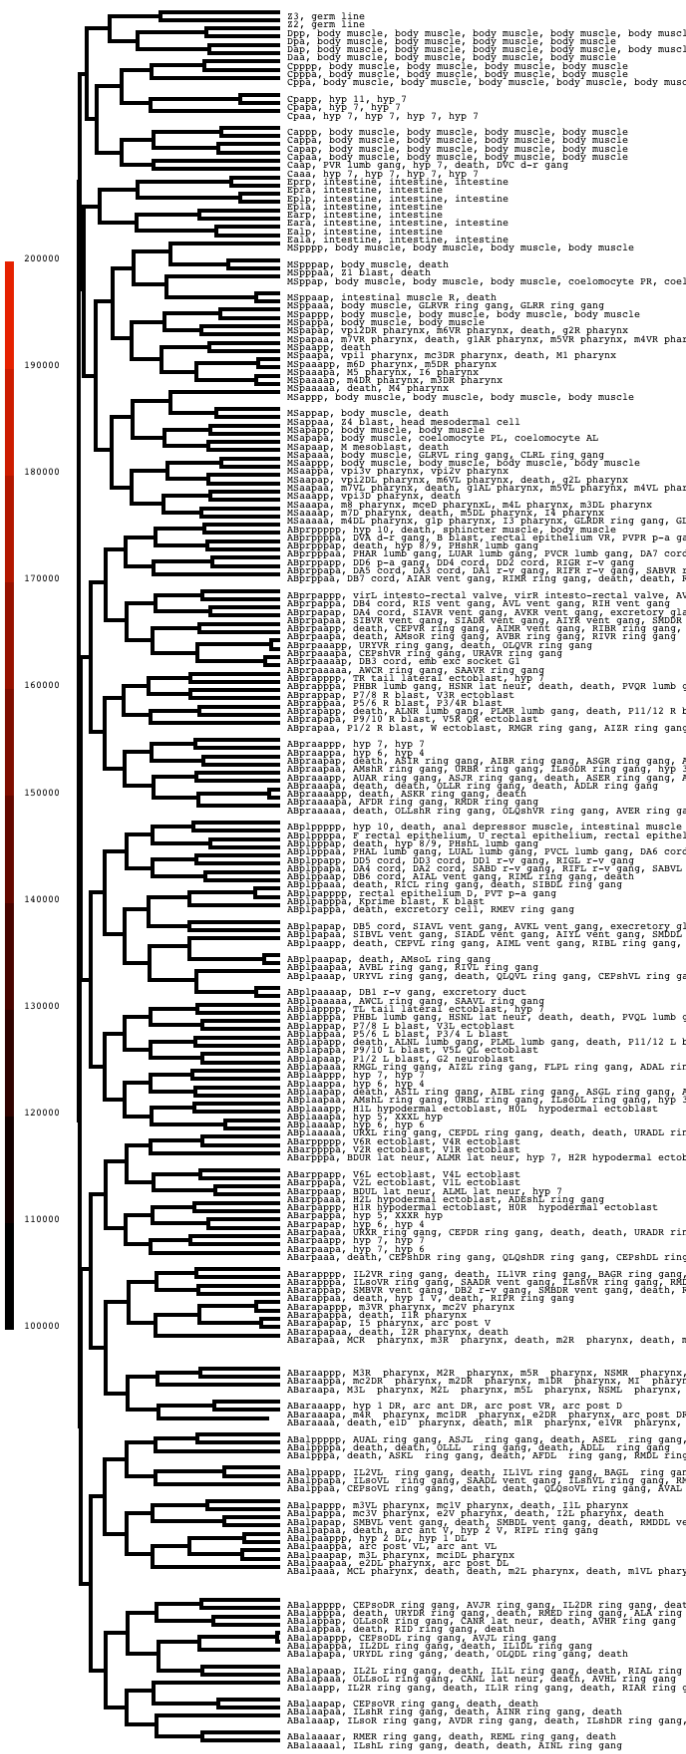





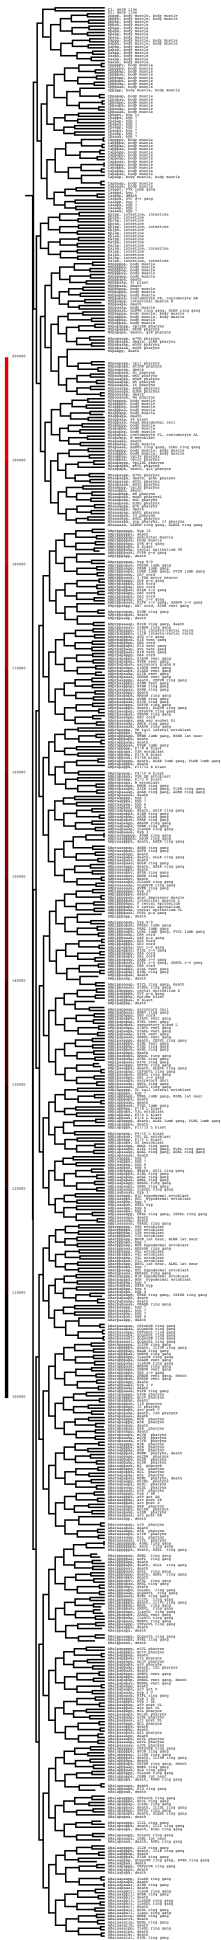



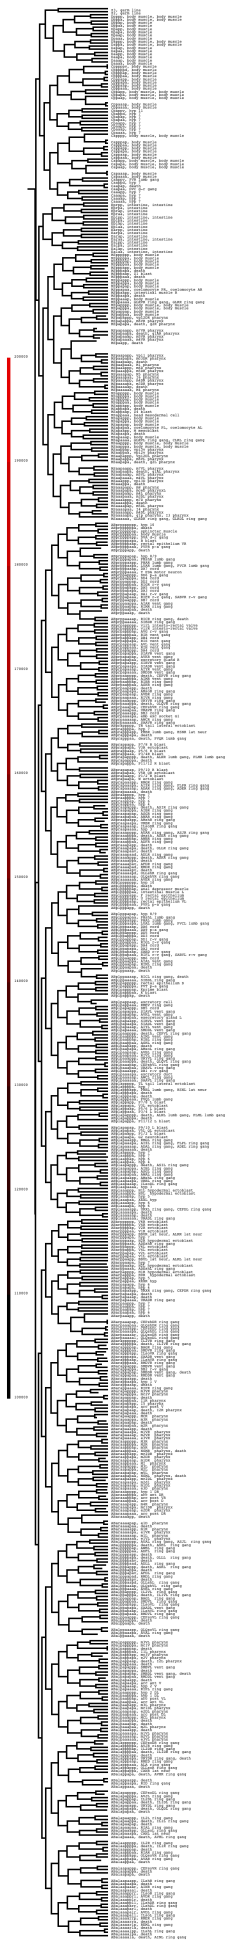











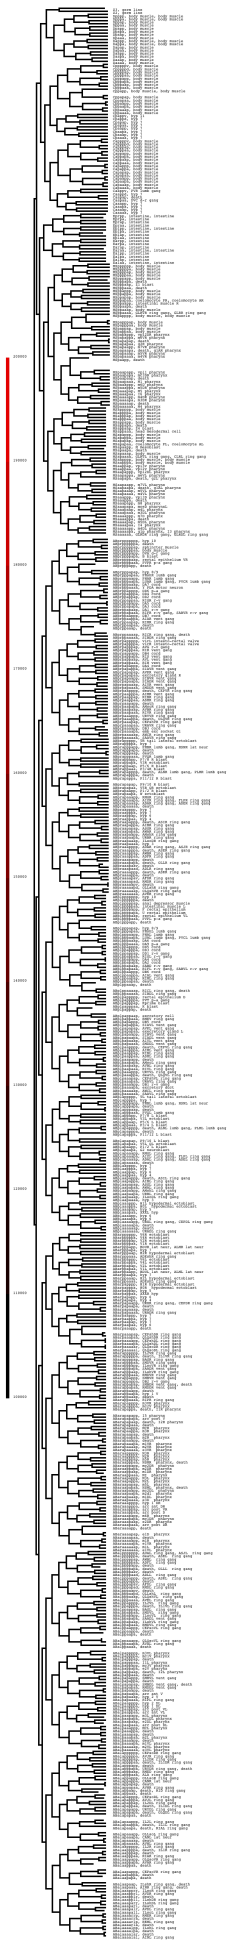

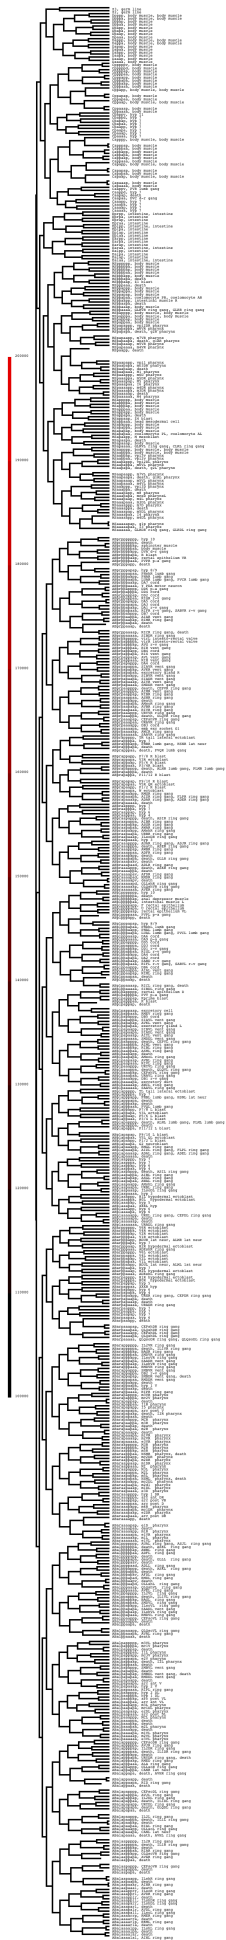

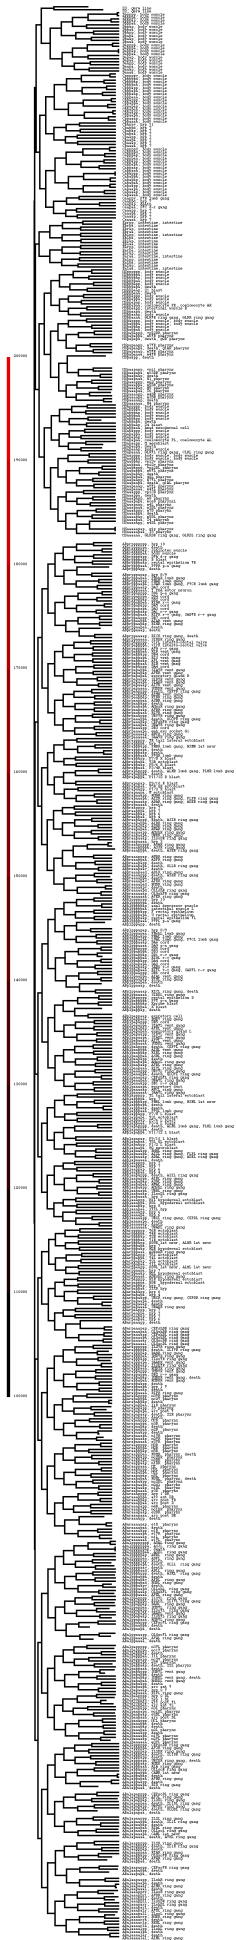



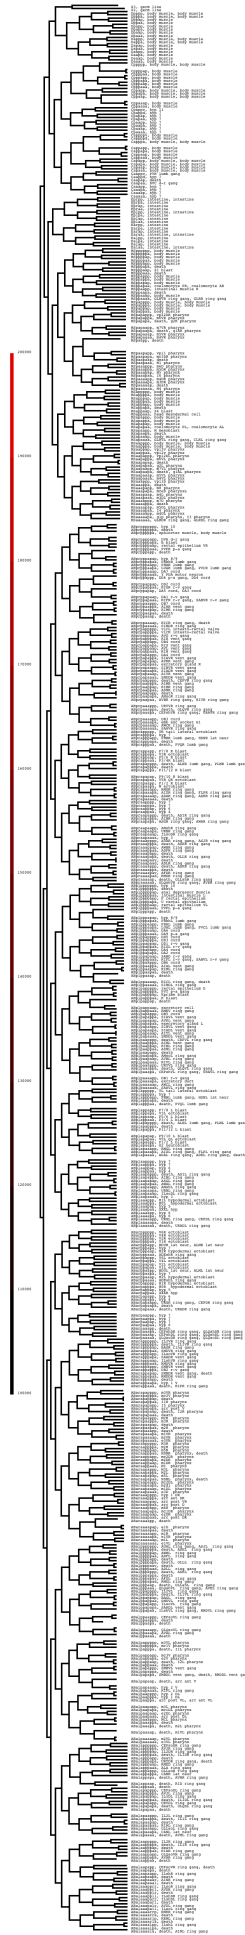

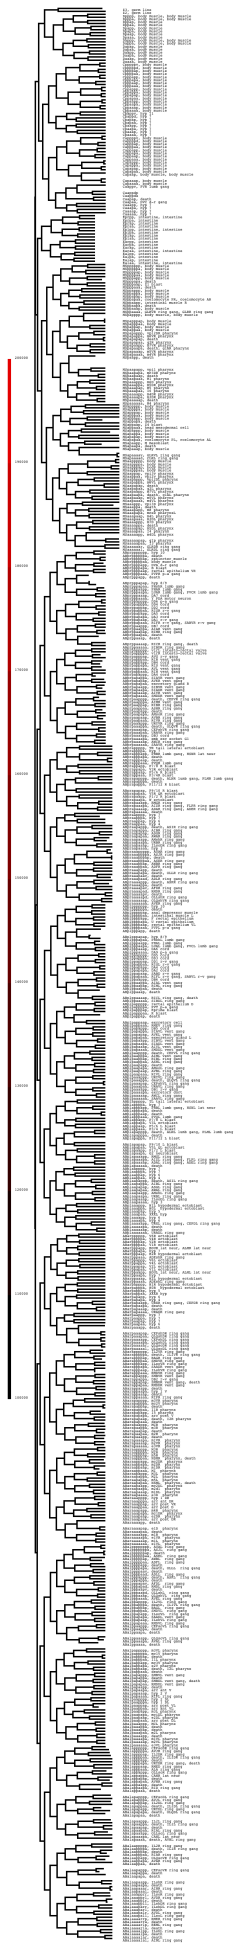

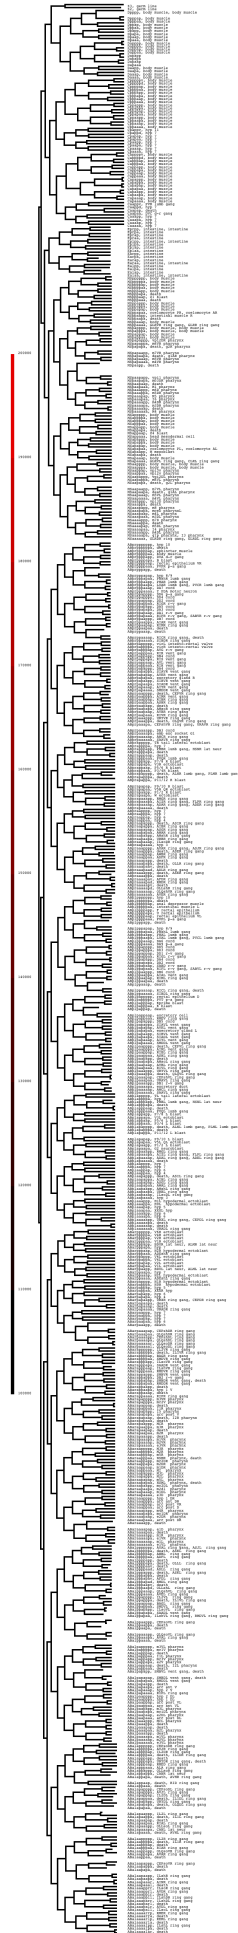

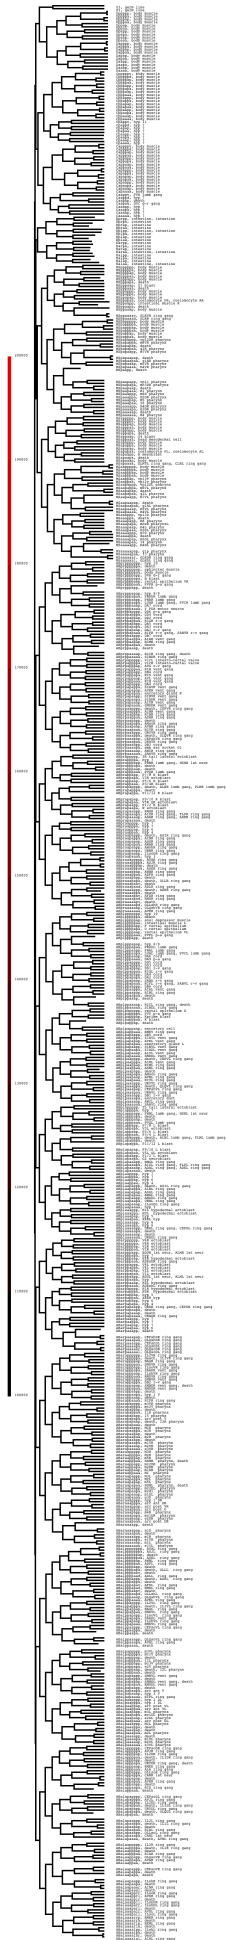

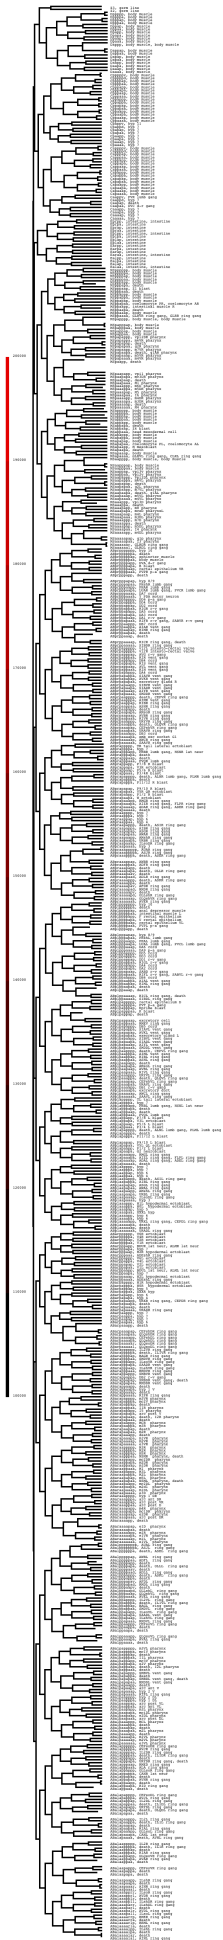

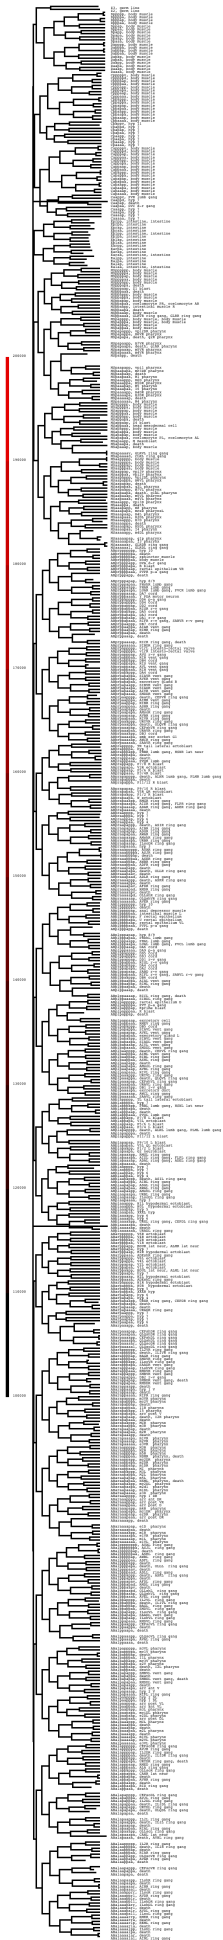

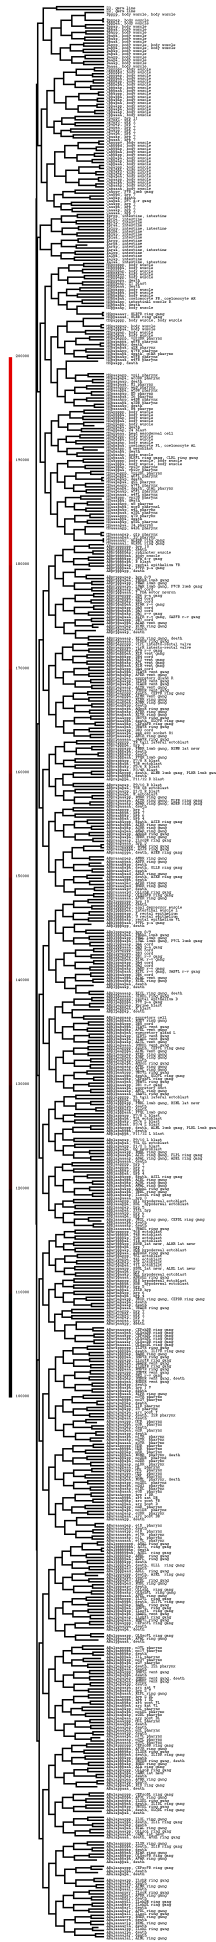

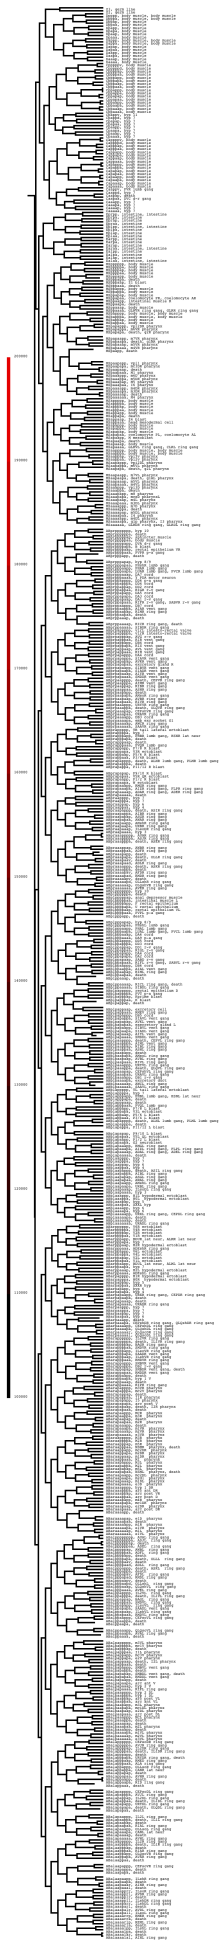



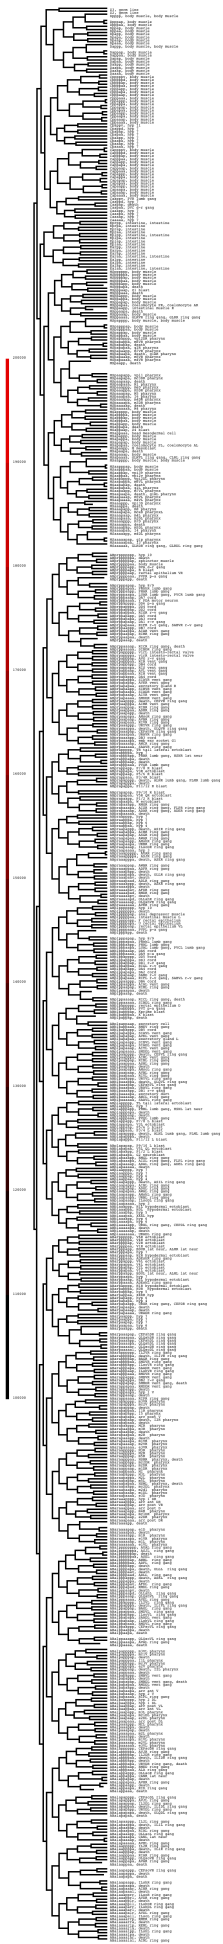

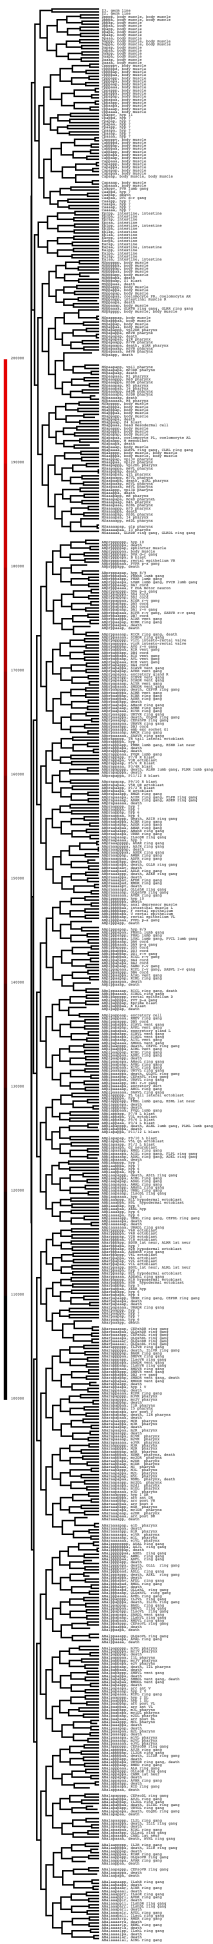

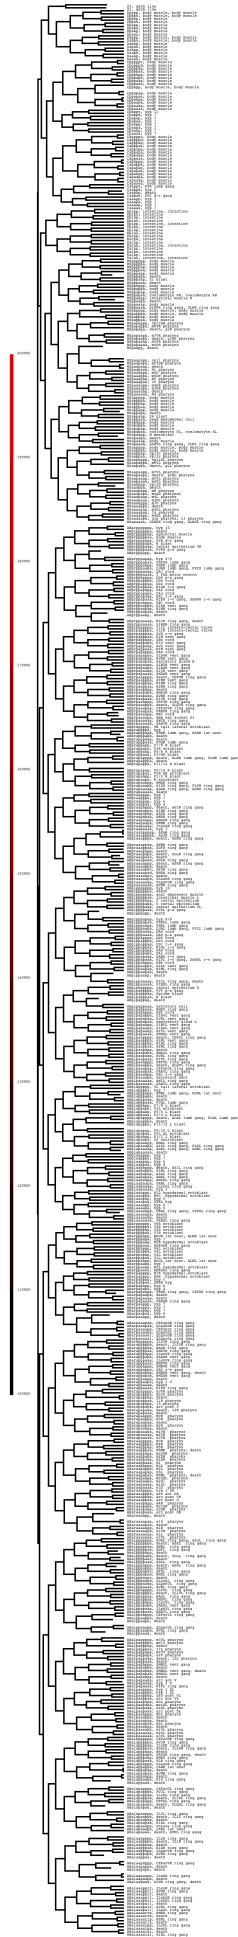

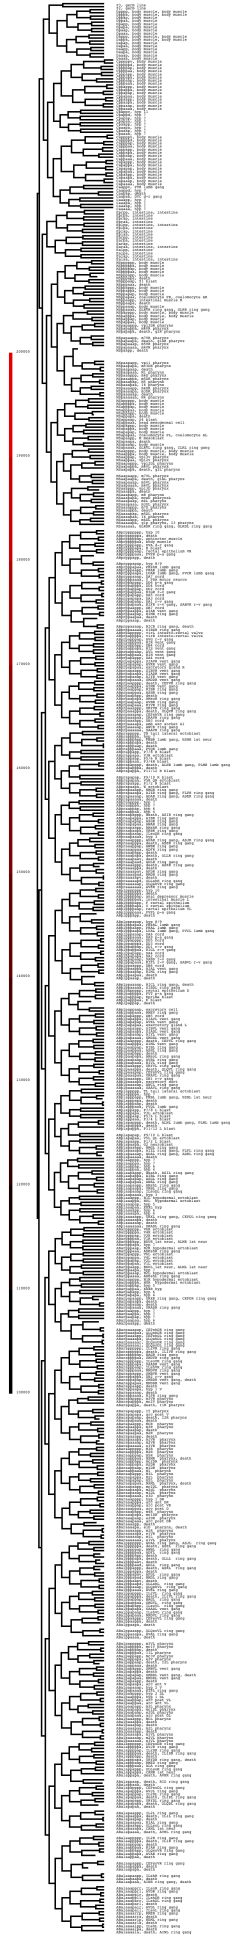

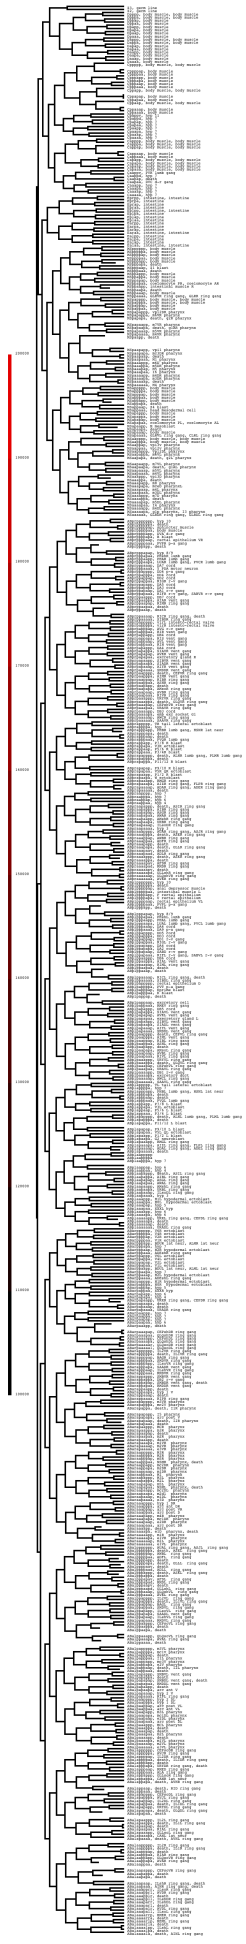

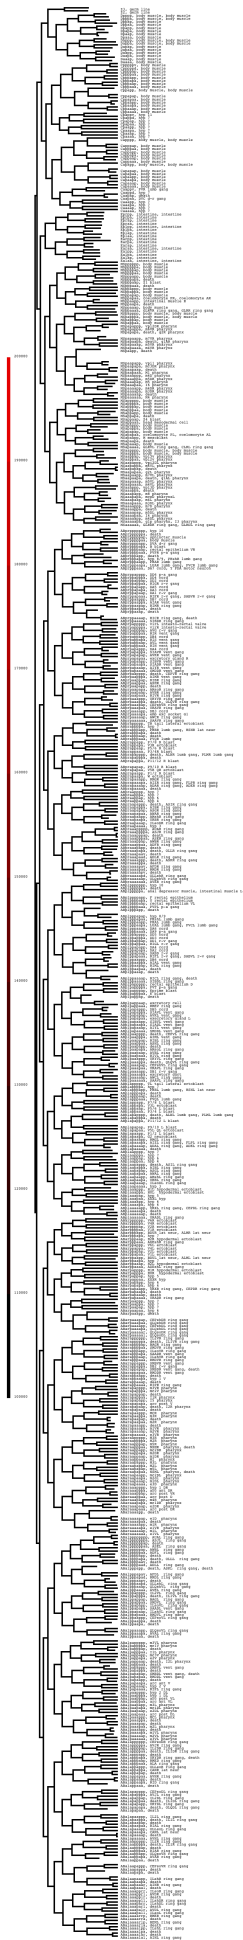

Supplement: NIHMS428096-supplement-04.pdf [file NIHMS428096-supplement-04.pdf]
